# Supplementary material for: Reduction of MDSCs with All-trans Retinoic Acid Improves CAR Therapy Efficacy for Sarcomas
Source: Oxford University Press journal article supplement (doi:10.1158/2326-6066.cir-15-0230), 2016-08-22
Supplement: 23266066cir150230-sup-155312_2_supp_3596022_rrqrfr.docx [file 23266066cir150230-sup-155312_2_supp_3596022_rrqrfr.docx]

**Supplemental Table S1: GD2 expression on pediatric sarcomas**

| **Sample** | **Histology** | **Tumor** | **% of Cells Expressing GD2** |
| --- | --- | --- | --- |
| 1 | Osteosarcoma | Primary (hip) | 80% |
| 2 | Osteosarcoma | Primary (sacrum) | 80% |
| 3 | Osteosarcoma | Primary (knee) | 80% |
| 4 | Osteosarcoma | Primary (pelvis) | 80% |
| 5 | Osteosarcoma | Primary (tibia) | 80% |
| 6 | Osteosarcoma | Primary (femur) | 30% |
| 7 | Osteosarcoma | Primary (femur) | 10% |
| 8 | Osteosarcoma | Primary (tibia) | 10% |
| 9 | Osteosarcoma | Metastasis (lung) | 100% |
| 10 | Osteosarcoma | Metastasis (lung) | 100% |
| 11 | Osteosarcoma | Metastasis (lung) | 100% |
| 12 | Osteosarcoma | Metastasis (lung) | 100% |
| 13 | Osteosarcoma | Metastasis (lung) | 80% |
| 14 | Osteosarcoma | Metastasis (lung) | 80% |
| 15 | Osteosarcoma | Metastasis (lung) | 90% |
| 16 | Osteosarcoma | Metastasis (lymph node) | 60% |
| 17 | Osteosarcoma | Metastasis (lung) | 60% |
| 18 | Osteosarcoma | Metastasis (lung) | 100% |
| 19 | Alveolar RMS | Recurrent (bladder) | 100% |
| 20 | Alveolar RMS | Primary (forearm) | 80% |
| 21 | Alveolar RMS | Primary (sinus) | 0% |
| 22 | Alveolar RMS | Primary (abdomen) | 0% |
| 23 | Alveolar RMS | Primary (prostate) | 0% |
| 24 | Alveolar RMS | Primary (paraspinal) | 0% |
| 25 | Alveolar RMS | Primary (chest wall) | 0% |
| 26 | Alveolar RMS | Metastasis (lymph node) | 0% |
| 27 | Alveolar RMS | Metastasis (lymph node) | 0% |
| 28 | Embryonal RMS | Metastasis (paraspinal) | 0% |
| 29 | Alveolar RMS | Metastasis (breast) | 0% |
| 30 | Alveolar RMS | Metastasis (lung-pleura) | 0% |
| 31 | Alveolar RMS | Metastasis (breast) | 0% |
| 32 | Alveolar RMS | Recurrent (pancreas) | 0% |
| 33 | Alveolar RMS | Metastasis (lung) | 0% |
| 34 | Ewing Sarcoma | Primary (humerus) | 60% |
| 35 | Ewing Sarcoma | Primary (thigh) | 40% |
| 36 | Ewing Sarcoma | Primary (chest wall) | 5% |
| 37 | Ewing Sarcoma | Primary (thigh) | 3% |
| 38 | Ewing Sarcoma | Primary (epidural) | 0% |
| 39 | Ewing Sarcoma | Primary (femur) | 0% |
| 40 | Ewing Sarcoma | Primary (pelvis) | 0% |
| 41 | Ewing Sarcoma | Primary (retroperitoneal) | 0% |
| 42 | Ewing Sarcoma | Primary (paraspinal) | 0% |
| 43 | Ewing Sarcoma | Primary (pelvis) | 0% |
| 44 | Ewing Sarcoma | Primary (chest wall) | 0% |
| 45 | Ewing Sarcoma | Primary (pelvis) | 0% |
| 46 | Ewing Sarcoma | Primary (shoulder) | 0% |
| 47 | Ewing Sarcoma | Primary (leg) | 0% |
| 48 | Ewing Sarcoma | Primary (pelvis) | 0% |
| 49 | Ewing Sarcoma | Primary (calf) | 0% |
| 50 | Ewing Sarcoma | Primary (pelvis) | 0% |
| 51 | Ewing Sarcoma | Primary (fibula) | 0% |
| 52 | Ewing Sarcoma | Primary (chest wall) | 0% |
| 53 | Ewing Sarcoma | Primary (leg) | 0% |
| 54 | Ewing Sarcoma | Metastasis (chest wall) | 30% |
| 55 | Ewing Sarcoma | Metastasis (lung) | 10% |
| 56 | Ewing Sarcoma | Metastasis (lung) | 5% |
| 57 | Ewing Sarcoma | Metastasis | 0% |
| 58 | Ewing Sarcoma | Metastasis | 0% |
| 59 | Ewing Sarcoma | Metastasis | 0% |
| 60 | Ewing Sarcoma | Metastasis | 0% |
| 61 | Ewing Sarcoma | Metastasis | 0% |
| 62 | Ewing Sarcoma | Metastasis | 0% |
| 63 | Ewing Sarcoma | Metastasis | 0% |
| 64 | Ewing Sarcoma | Metastasis | 0% |
| 65 | Ewing Sarcoma | Metastasis | 0% |
| 66 | Ewing Sarcoma | Metastasis | 0% |
| 67 | Ewing Sarcoma | Metastasis | 0% |
| 68 | Ewing Sarcoma | n/a | 0% |
